# Supplementary material
Source: PubMed Central journal article supplement (PMC4822661)

## **Supplementary materials**

### ***Preparation of autoantibodies against H1-4, H1-11 and H1-12 from plasma of patients with anti-GBM disease by using microtiter plates***

According to a previously described method (Radanova M, et al, Immunobiology, 2012), microtiter plates (Costar, Corning, NY) were coated with 10 µg/ml of H1-4, H1-11 or H1-12 in 0.05 mol/l bicarbonate buffer (pH 9.6) for 1 h at 37°C. After blocking with 1% BSA, the plates were incubated overnight at 4°C with test plasma diluted to 1:50 in PBS/0.5 M NaCl. After washing, the bound autoantibodies were eluted with 50 µl/well of 0.1 M glycine-HCl, pH 2.8 (1 min incubation). The glycine buffer in the wells was immediately neutralized using 10 µl of 1.5 M Tris, pH 8.8. Aliquots of the eluted autoantibodies against H1-4, H1-11 and H1-12 were pooled, respectively and were dialyzed extensively against PBS/0.75 M NaCl. The protein concentrations of the eluted autoantibodies were determined spectrophotometrically (OD<sub>280</sub>).

### ***Complement C3 deposition assay***

A C3 deposition assay was performed according to a previously described method (Roumenina LT, et al, J Biol Chem, 2011). Briefly, microtiter plates were coated with 2 µg/ml recombinant human  $\alpha$ 3(IV)NC1 or 10 µg/ml H1-4, H1-11 or H1-12 as the solid phase antigens. After blocking with 1% BSA, the wells were washed with PBS plus 0.1% Tween-20. Purified total IgG from a patient with positive anti- $\alpha$ 3(IV)NC1 autoantibodies at 0.2 mg/ml was applied to the wells as positive control to form immune complexes. Purified total IgG from a healthy human (Sigma,

St Louis, MO, USA) at 0.2 mg/ml was applied to the wells as negative control, and 0.2 mg/ml of autoantibodies against H1-4, H1-11 or H1-12 was applied to the wells coated with respective antigens as testing samples. After washing with veronal-buffered saline (VBST)<sup>Ca+Mg</sup> (VBS containing 0.15 mmol/l calcium and 0.5 mmol/l magnesium with 0.1% Tween 20), 1% fresh normal human plasma diluted in VBST was added to provide complement components. The plates were then incubated for 1 h at 37°C. After washing, the plates were incubated with a rabbit polyclonal antibody against human C3c (Dako, Denmark) for 1 h at 37°C, followed by incubation with goat anti-rabbit IgG conjugated with alkaline phosphatase for 1 h at 37°C. After three washes, P-nitrophenyl phosphate (PNPP, 1 mg/ml; Sigma, St. Louis, MO, USA) was added to the substrate buffer (1 M diethanolamine and 0.5 mM MgCl<sub>2</sub> (pH 9.8)). The OD was measured at 405 nm.

**Figure 1. Cross-reactivity between autoantibodies against  $\alpha 3(\text{IV})\text{NC1}$ , and H1-4, H1-12.** A) The microtiter plate was coated with H1-4 and was competed with different concentrations of H1-4 and  $\alpha 3(\text{IV})\text{NC1}$ . B) The microtiter plate was coated with H1-12 and was competed with different concentrations of H1-12 and  $\alpha 3(\text{IV})\text{NC1}$ .

**Figure 2. C3 deposition assay.** The combination of  $\alpha 3(\text{IV})\text{NC1}$  and anti- $\alpha 3(\text{IV})\text{NC1}$  autoantibodies could fix complement, while combination of  $\alpha 3(\text{IV})\text{NC1}$  and normal human IgG could not fix complement. Combination of autoantibodies against linear MPO peptides and their corresponding peptides could fix complement.

**Figure 3. H1-4 and H1-12 on the surface of the MPO molecule (PDB: 3F9P).** Amino acid sequence of H1 is in cyan, H1-4 is in red, and H1-11 is in magenta.

Figure 1.

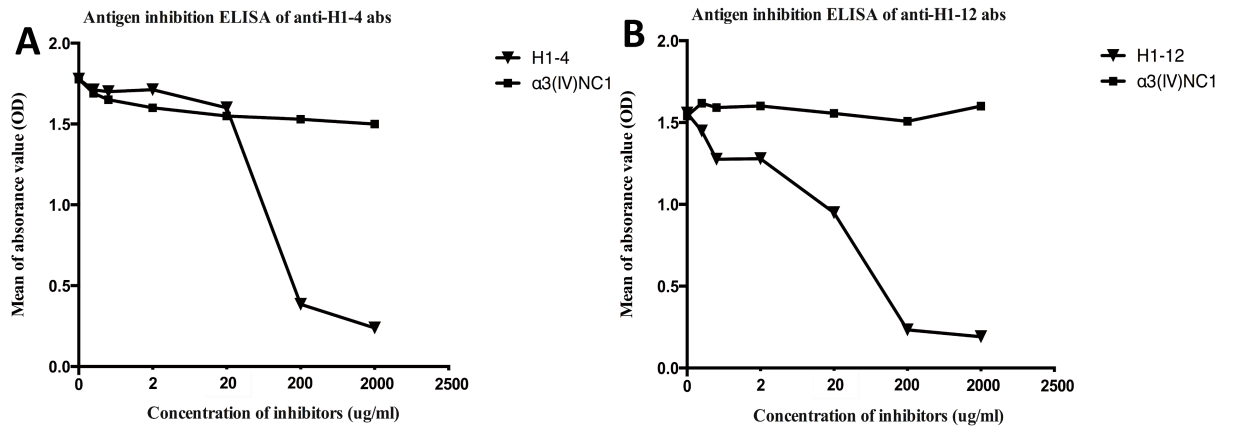

Figure 2.

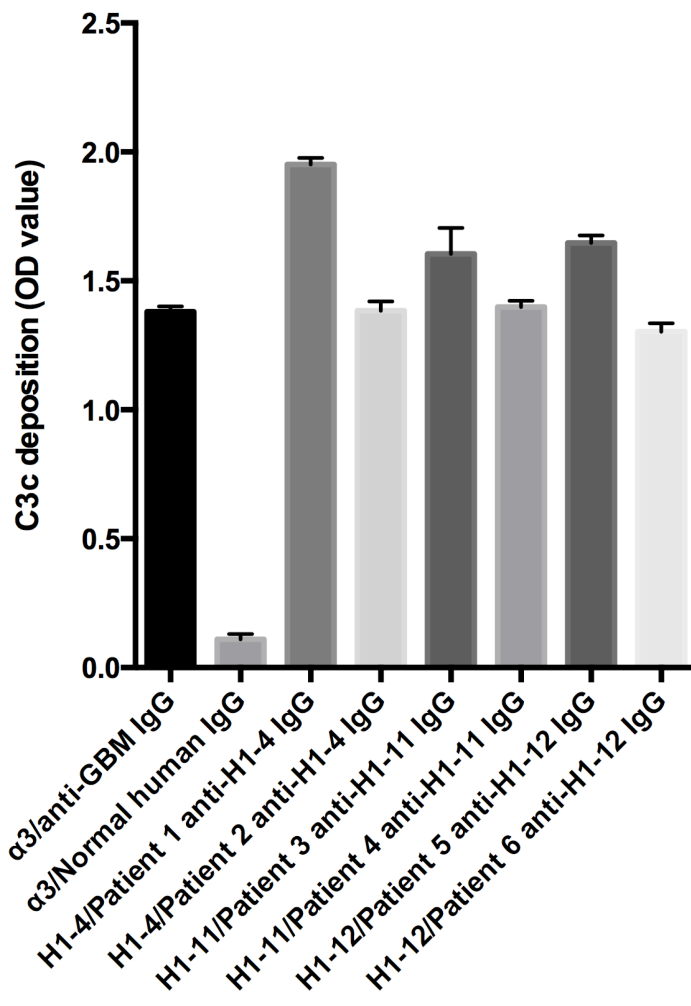

Figure 3

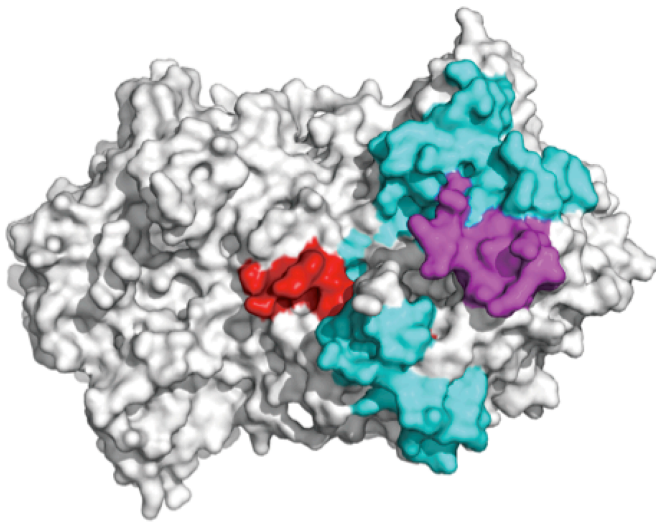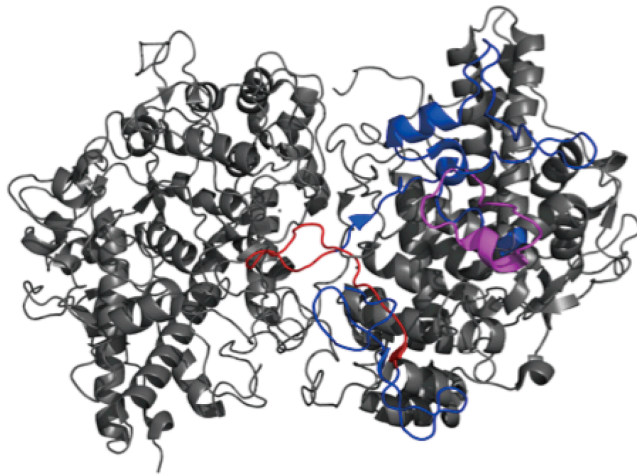

Supplement: CJN.05270515_CJN05270515SupplementaryData.pdf [file CJN.05270515_CJN05270515SupplementaryData.pdf]
